# Supplementary material for: Performance analysis of spectrum sharing mechanisms in cognitive radio networks
Source: Springer Nature journal article supplement (doi:10.1186/1687-1499-2011-129), 2011-10-11
Supplement: 13638_2011_129_MOESM6_ESM.pdf [file 13638_2011_129_MOESM6_ESM.pdf]

## Known Equilibrium Probabilities

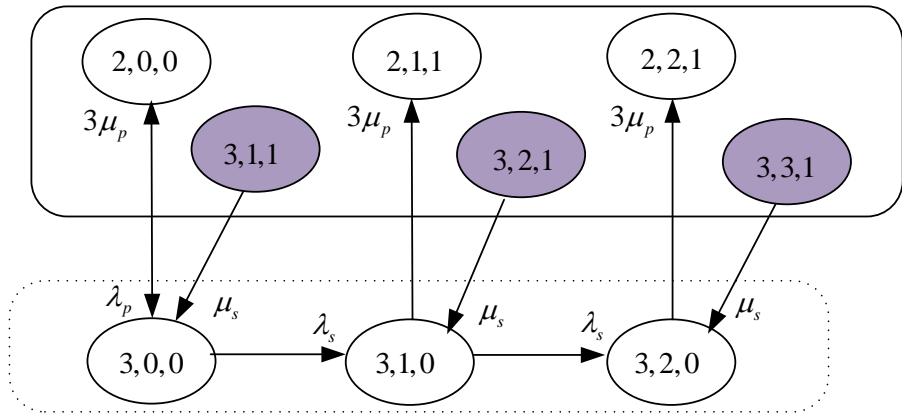

## Unknown Equilibrium Probabilities
